# Supplementary material for: The effects of mismatched train and test data cleaning pipelines on regression models: lessons for practice
Source: PeerJ journal article supplement (doi:10.7717/peerj-cs.2793), 2025-04-02
Supplement: mismatched_data_cleaning.zip [file mismatched_data_cleaning.zip]

Appendix of ‘The effects of mismatched train and test data cleaning pipelines on regression models: lessons for practice’

**Cleaning Setups - Airbnb Data**

| Setup number | mv_repair   | outlier_detection | outlier_repair | duplicate_repair |
|--------------|-------------|-------------------|----------------|------------------|
| 0            | delete      | none              | NA             | NA               |
| 1            | delete      | none              | NA             | key_val          |
| 2            | delete      | SD                | mean           | NA               |
| 3            | delete      | SD                | mean           | key_val          |
| 4            | delete      | SD                | median         | NA               |
| 5            | delete      | SD                | median         | key_val          |
| 6            | delete      | SD                | mode           | NA               |
| 7            | delete      | SD                | mode           | key_val          |
| 8            | delete      | IQR               | mean           | NA               |
| 9            | delete      | IQR               | mean           | key_val          |
| 10           | delete      | IQR               | median         | NA               |
| 11           | delete      | IQR               | median         | key_val          |
| 12           | delete      | IQR               | mode           | NA               |
| 13           | delete      | IQR               | mode           | key_val          |
| 14           | mean-mode   | none              | NA             | NA               |
| 15           | mean-mode   | none              | NA             | key_val          |
| 16           | mean-mode   | SD                | mean           | NA               |
| 17           | mean-mode   | SD                | mean           | key_val          |
| 18           | mean-mode   | SD                | median         | NA               |
| 19           | mean-mode   | SD                | median         | key_val          |
| 20           | mean-mode   | SD                | mode           | NA               |
| 21           | mean-mode   | SD                | mode           | key_val          |
| 22           | mean-mode   | IQR               | mean           | NA               |
| 23           | mean-mode   | IQR               | mean           | key_val          |
| 24           | mean-mode   | IQR               | median         | NA               |
| 25           | mean-mode   | IQR               | median         | key_val          |
| 26           | mean-mode   | IQR               | mode           | NA               |
| 27           | mean-mode   | IQR               | mode           | key_val          |
| 28           | median-mode | none              | NA             | NA               |
| 29           | median-mode | none              | NA             | key_val          |
| 30           | median-mode | SD                | mean           | NA               |
| 31           | median-mode | SD                | mean           | key_val          |
| 32           | median-mode | SD                | median         | NA               |
| 33           | median-mode | SD                | median         | key_val          |
| 34           | median-mode | SD                | mode           | NA               |
| 35           | median-mode | SD                | mode           | key_val          |

|    |              |      |        |         |
|----|--------------|------|--------|---------|
| 36 | median-mode  | IQR  | mean   | NA      |
| 37 | median-mode  | IQR  | mean   | key_val |
| 38 | median-mode  | IQR  | median | NA      |
| 39 | median-mode  | IQR  | median | key_val |
| 40 | median-mode  | IQR  | mode   | NA      |
| 41 | median-mode  | IQR  | mode   | key_val |
| 42 | mode-mode    | none | NA     | NA      |
| 43 | mode-mode    | none | NA     | key_val |
| 44 | mode-mode    | SD   | mean   | NA      |
| 45 | mode-mode    | SD   | mean   | key_val |
| 46 | mode-mode    | SD   | median | NA      |
| 47 | mode-mode    | SD   | median | key_val |
| 48 | mode-mode    | SD   | mode   | NA      |
| 49 | mode-mode    | SD   | mode   | key_val |
| 50 | mode-mode    | IQR  | mean   | NA      |
| 51 | mode-mode    | IQR  | mean   | key_val |
| 52 | mode-mode    | IQR  | median | NA      |
| 53 | mode-mode    | IQR  | median | key_val |
| 54 | mode-mode    | IQR  | mode   | NA      |
| 55 | mode-mode    | IQR  | mode   | key_val |
| 56 | mean-dummy   | none | NA     | NA      |
| 57 | mean-dummy   | none | NA     | key_val |
| 58 | mean-dummy   | SD   | mean   | NA      |
| 59 | mean-dummy   | SD   | mean   | key_val |
| 60 | mean-dummy   | SD   | median | NA      |
| 61 | mean-dummy   | SD   | median | key_val |
| 62 | mean-dummy   | SD   | mode   | NA      |
| 63 | mean-dummy   | SD   | mode   | key_val |
| 64 | mean-dummy   | IQR  | mean   | NA      |
| 65 | mean-dummy   | IQR  | mean   | key_val |
| 66 | mean-dummy   | IQR  | median | NA      |
| 67 | mean-dummy   | IQR  | median | key_val |
| 68 | mean-dummy   | IQR  | mode   | NA      |
| 69 | mean-dummy   | IQR  | mode   | key_val |
| 70 | median-dummy | none | NA     | NA      |
| 71 | median-dummy | none | NA     | key_val |
| 72 | median-dummy | SD   | mean   | NA      |
| 73 | median-dummy | SD   | mean   | key_val |
| 74 | median-dummy | SD   | median | NA      |
| 75 | median-dummy | SD   | median | key_val |
| 76 | median-dummy | SD   | mode   | NA      |
| 77 | median-dummy | SD   | mode   | key_val |
| 78 | median-dummy | IQR  | mean   | NA      |
| 79 | median-dummy | IQR  | mean   | key_val |
| 80 | median-dummy | IQR  | median | NA      |
| 81 | median-dummy | IQR  | median | key_val |

|    |              |      |        |         |
|----|--------------|------|--------|---------|
| 82 | median-dummy | IQR  | mode   | NA      |
| 83 | median-dummy | IQR  | mode   | key_val |
| 84 | mode-dummy   | none | NA     | NA      |
| 85 | mode-dummy   | none | NA     | key_val |
| 86 | mode-dummy   | SD   | mean   | NA      |
| 87 | mode-dummy   | SD   | mean   | key_val |
| 88 | mode-dummy   | SD   | median | NA      |
| 89 | mode-dummy   | SD   | median | key_val |
| 90 | mode-dummy   | SD   | mode   | NA      |
| 91 | mode-dummy   | SD   | mode   | key_val |
| 92 | mode-dummy   | IQR  | mean   | NA      |
| 93 | mode-dummy   | IQR  | mean   | key_val |
| 94 | mode-dummy   | IQR  | median | NA      |
| 95 | mode-dummy   | IQR  | median | key_val |
| 96 | mode-dummy   | IQR  | mode   | NA      |
| 97 | mode-dummy   | IQR  | mode   | key_val |

---

Table 1: Numbering of cleaning pipelines for Airbnb dataset.
